# Supplementary material for: Analysis of hereditary cancer syndromes by using a panel of genes: novel and multiple pathogenic mutations
Source: Springer Nature journal article supplement (doi:10.1186/s12885-019-5756-4), 2019-06-03
Supplement: MOESM2 [file 16767918]

**Table S1** Frequency of Pathogenic and Likely Pathogenic variants among genes.

| Gene                     | Total<br>Individuals No.<br>(%) | Affected Individuals No. (%) |                   |                | Unaffected Individuals No. (%) |                            |                         |
|--------------------------|---------------------------------|------------------------------|-------------------|----------------|--------------------------------|----------------------------|-------------------------|
|                          |                                 | Breast Cancer                | Colorectal Cancer | Ovarian Cancer | FH of Breast<br>Cancer         | FH of Colorectal<br>Cancer | FH of Ovarian<br>Cancer |
| <i>APC</i>               | 5/771 (0.6)                     | 1/502 (0.2)                  | 2/51 (3.9)        | 0/23(0.0)      | 0/72 (0.0)                     | 2/22 (9.1)                 | 0/19 (0.0)              |
| <i>ATM</i>               | 14/1197 (1.2)                   | 11/768 (1.4)                 | 0/68 (0.0)        | 0/42 (0.0)     | 0/103 (0.0)                    | 0/32 (0.0)                 | 1/30 (3.3)              |
| <i>BARD1</i>             | 5/1197 (0.4)                    | 3/768 (0.4)                  | 0/68 (0.0)        | 0/42 (0.0)     | 2/103 (1.9)                    | 0/32 (0.0)                 | 1/30 (3.3)              |
| <i>BLM</i>               | 2/465 (0.4)                     | 2/297 (0.7)                  | 0/25 (0.0)        | 0/18 (0.0)     | 0/36 (0.0)                     | 0/12 (0.0)                 | 0/12 (0.0)              |
| <i>BRCA1</i>             | 90/1197 (7.5)                   | 70/768 (9.1)                 | 2/68 (2.9)        | 6/42 (14.3)    | 3/103 (2.9)                    | 2/32 (6.3)                 | 1/30 (3.3)              |
| <i>BRCA2</i>             | 36/1197 (3.0)                   | 27/768 (3.5)                 | 0/68 (0.0)        | 0/42 (0.0)     | 4/103 (3.9)                    | 0/32 (0.0)                 | 4/30 (13.3)             |
| <i>BRIP1</i>             | 6/1197 (0.5)                    | 4/768 (0.5)                  | 1/68 (1.5)        | 0/42 (0.0)     | 1/103 (1.0)                    | 1/32 (3.1)                 | 1/30 (3.3)              |
| <i>CHEK2</i>             | 30/1197 (2.5)                   | 27/768 (3.5)                 | 1/68 (1.5)        | 0/42 (0.0)     | 1/103 (1.0)                    | 1/32 (3.1)                 | 1/30 (3.3)              |
| <i>EPCAM</i>             | 1/1197 (0.1)                    | 0/768 (0.0)                  | 1/68 (1.5)        | 0/42 (0.0)     | 0/103 (0.0)                    | 0/32 (0.0)                 | 0/30 (0.0)              |
| <i>ABRAXAS1</i>          | 1/465 (0.2)                     | 1/297 (0.3)                  | 0/25 (0.0)        | 0/18 (0.0)     | 0/36 (0.0)                     | 0/12 (0.0)                 | 0/12 (0.0)              |
| <i>MLH1</i>              | 5/1197 (0.4)                    | 1/768 (0.1)                  | 3/68 (4.4)        | 0/42 (0.0)     | 0/103 (0.0)                    | 1/32 (3.1)                 | 0/30 (0.0)              |
| <i>MSH2</i>              | 5/1197 (0.4)                    | 0/768 (0.0)                  | 3/68 (4.4)        | 0/42 (0.0)     | 0/103 (0.0)                    | 0/32 (0.0)                 | 0/30 (0.0)              |
| <i>MSH6</i>              | 5/1197 (0.4)                    | 2/768 (0.3)                  | 3/68 (4.4)        | 0/42 (0.0)     | 0/103 (0.0)                    | 0/32 (0.0)                 | 0/30 (0.0)              |
| <i>MUTYH-monoallelic</i> | 21/1197 (1.8)                   | 11/768 (1.4)                 | 5/68 (7.4)        | 0/42 (0.0)     | 1/103 (1.0)                    | 0/32 (0.0)                 | 0/30 (0.0)              |
| <i>MUTYH-biallelic</i>   | 3/1197 (0.3)                    | 0/768 (0.0)                  | 3/68 (4.4)        | 0/42 (0.0)     | 0/103 (0.0)                    | 0/32 (0.0)                 | 0/30 (0.0)              |
| <i>NBN</i>               | 6/1197 (0.5)                    | 5/768 (0.7)                  | 0/68 (0.0)        | 1/42 (2.4)     | 0/103 (0.0)                    | 0/32 (0.0)                 | 0/30 (0.0)              |
| <i>NF1</i>               | 1/527 (0.2)                     | 1/361 (0.3)                  | 0/31 (0.0)        | 0/19 (0.0)     | 0/38 (0.0)                     | 0/12 (0.0)                 | 0/12 (0.0)              |
| <i>PALB2</i>             | 20/1197 (1.7)                   | 13/768 (1.7)                 | 1/68 (1.5)        | 1/42 (2.4)     | 1/103 (1.0)                    | 0/32 (0.0)                 | 0/30 (0.0)              |
| <i>PMS2</i>              | 6/1197 (0.5)                    | 6/768 (0.8)                  | 0/68 (0.0)        | 0/42 (0.0)     | 0/103 (0.0)                    | 0/32 (0.0)                 | 0/30 (0.0)              |
| <i>PTEN</i>              | 1/1197 (0.1)                    | 1/768 (0.1)                  | 0/68 (0.0)        | 0/42 (0.0)     | 0/103 (0.0)                    | 0/32 (0.0)                 | 0/30 (0.0)              |
| <i>RAD50</i>             | 11/1180 (0.9)                   | 8/768 (1.0)                  | 0/68 (0.0)        | 0/42 (0.0)     | 1/103 (1.0)                    | 0/32 (0.0)                 | 0/30 (0.0)              |
| <i>RAD51B</i>            | 1/698 (0.1)                     | 1/471 (0.2)                  | 0/47 (0.0)        | 0/21 (0.0)     | 0/68 (0.0)                     | 0/18 (0.0)                 | 0/18 (0.0)              |
| <i>RAD51C</i>            | 2/1197 (0.2)                    | 2/768 (0.3)                  | 0/68 (0.0)        | 0/42 (0.0)     | 0/103 (0.0)                    | 0/32 (0.0)                 | 0/30 (0.0)              |
| <i>RET</i>               | 2/763 (0.3)                     | 0/502 (0.0)                  | 1/47 (2.1)        | 0/23 (0.0)     | 0/72 (0.0)                     | 0/21 (0.0)                 | 0/19 (0.0)              |
| <i>STK11</i>             | 1/1197 (0.1)                    | 0/768 (0.0)                  | 0/68 (0.0)        | 0/42 (0.0)     | 0/103 (0.0)                    | 0/32 (0.0)                 | 0/30 (0.0)              |
| <i>TP53</i>              | 6/1197 (0.5)                    | 5/768 (0.7)                  | 0/68 (0.0)        | 0/42 (0.0)     | 0/103 (0.0)                    | 0/32(0.0)                  | 0/30 (0.0)              |
| <i>VHL</i>               | 1/763 (0.0)                     | 0/502 (0.0)                  | 0/47 (0.0)        | 0/23 (0.0)     | 0/72 (0.0)                     | 0/21 (0.0)                 | 0/19 (0.0)              |
| <i>XRCC2</i>             | 1/465 (0.2)                     | 1/297 (0.3)                  | 0/25 (0.0)        | 0/18 (0.0)     | 0/36 (0.0)                     | 0/12 (0.0)                 | 0/12 (0.0)              |
