# Supplementary material for: Analysis of hereditary cancer syndromes by using a panel of genes: novel and multiple pathogenic mutations
Source: Springer Nature journal article supplement (doi:10.1186/s12885-019-5756-4), 2019-06-03
Supplement: MOESM4 [file 16767918]

**Table S3** Large Genomic Rearrangements (LGRs)

| GENE       | HGVS nomenclature                                                            | Other nomenclature                                            | Traditional nomenclature | # detected |
|------------|------------------------------------------------------------------------------|---------------------------------------------------------------|--------------------------|------------|
| BRCA1      | NM_007294:c.(?-1)_(80+1_81-1)del                                             | deletion of exons 1-2                                         |                          | 2          |
| BRCA1      | NM_007294:c.(441+1_442-1)_(547+1_548-1)del                                   | deletion of exon 7                                            | deletion of exon 8       | 1          |
| BRCA1      | NM_007294:c.(5074+1-5075-1)_(5193+1_5194-1)del                               | deletion of exons 17-18                                       | deletion of exons 18-19  | 1          |
| BRCA1      | NM_007294:c.(5467+1_5468-1)-(*1_?)del                                        | deletion of exon 23                                           | deletion of exon 24      | 4          |
| BRCA1      | NM_007294:c.(80+1_81-1)_(134+1_135-1)del                                     | deletion of exon 3                                            |                          | 1          |
| BRCA2      | NM_000059:c.(6841+1_6842-1)_(7007+1_7008-1)del                               | deletion of exons 12-13                                       |                          | 1          |
| CHEK2      | NM_007194:c.(908+1_909-1)_(1095+1_1096-1)del                                 | deletion of exons 9-10                                        |                          | 2          |
| EPCAM/MSH2 | NM_002354:c.(903+1_904-1)-(*1_?)del AND NM_000251:c.(?-1)_(1276+1_1277-1)del | deletion of 3' UTR of EPCAM and deletion of exons 1-7 of MSH2 |                          | 1          |
| MLH1       | NM_000249:c.(453+1_454-1)_(545+1_546-1)del                                   | deletion of exon 6                                            |                          | 1          |
| MSH2       | NM_000251:c.(1661+1_1662-1)-(*1_?)del                                        | deletion of exons 11-16                                       |                          | 1          |
| PMS2       | NM_000535:c.(?-1)-(*1_?)del                                                  | deletion of exons 1-15 (entire PSM2 gene)                     |                          | 1          |
