# Supplementary material for: Analysis of hereditary cancer syndromes by using a panel of genes: novel and multiple pathogenic mutations
Source: Springer Nature journal article supplement (doi:10.1186/s12885-019-5756-4), 2019-06-03
Supplement: MOESM5 [file 16767918]

**Table S4** Individuals with 2 Pathogenic/ Likely Pathogenic variants.

| #  | Gene         | cDNA                   | Protein                  | HGVS nomenclature | Classification              | Personal History of cancer      |
|----|--------------|------------------------|--------------------------|-------------------|-----------------------------|---------------------------------|
| 1  | <i>MSH2</i>  | Deletion (exons 11-16) |                          |                   | Pathogenic                  | Endometrium                     |
|    | <i>PALB2</i> | c.757_758delCT         | p.Leu253Ilefs*3          |                   | Pathogenic                  |                                 |
| 2  | <i>BRCA1</i> | c.181T>G               | p.Cys61Gly               |                   | Pathogenic                  | Breast                          |
|    | <i>CHEK2</i> | c.470T>C               | p.Ile157Thr              |                   | Pathogenic (low penetrance) |                                 |
| 3  | <i>MSH6</i>  | c.2136delG             | p.Asp713Ilefs*23         |                   | Pathogenic                  | Breast                          |
|    | <i>MUTYH</i> | c.1187G>A              | p.Gly396Asp              |                   | Pathogenic                  |                                 |
| 4  | <i>CHEK2</i> | c.1232G>A              | p.Trp411*                |                   | Pathogenic                  | Breast                          |
|    | <i>PMS2</i>  | c.(?-87)_(*160_?)del   |                          |                   | Pathogenic                  |                                 |
| 5  | <i>MUTYH</i> | c.536A>G               | p.Tyr179Cys              |                   | Pathogenic                  | CRC                             |
|    | <i>MUTYH</i> | c.1437_1439delGGA      | p.Glu479_Glu480delinsGlu |                   | Pathogenic                  |                                 |
| 6  | <i>MSH2</i>  | c.2131C>T              | p.Arg711*                |                   | Pathogenic                  | Endometrium and CRC             |
|    | <i>MUTYH</i> | c.1187G>A              | p.Gly396Asp              |                   | Pathogenic                  |                                 |
| 7  | <i>BRCA1</i> | c.737delT              | p.Leu246*                |                   | Pathogenic                  | Breast                          |
|    | <i>CHEK2</i> | c.470T>C               | p.Ile157Thr              |                   | Pathogenic (low penetrance) |                                 |
| 8  | <i>MSH2</i>  | c.2131C>T              | p.Arg711*                |                   | Pathogenic                  | CRC                             |
|    | <i>MUTYH</i> | c.1187G>A              | p.Gly396Asp              |                   | Pathogenic                  |                                 |
| 9  | <i>MSH2</i>  | c.2131C>T              | p.Arg711*                |                   | Pathogenic                  | Polyps in bile, uterus, stomach |
|    | <i>MUTYH</i> | c.1187G>A              | p.Gly396Asp              |                   | Pathogenic                  |                                 |
| 10 | <i>BLM</i>   | c.1642C>T              | p.Gln548*                |                   | Pathogenic                  | Breast                          |
|    | <i>CHEK2</i> | c.1283C>T              | p.Ser428Phe              |                   | Pathogenic                  |                                 |
| 11 | <i>MLH1</i>  | c.1409+1G>A            |                          |                   | Likely Pathogenic           | CRC and cholangioma             |
|    | <i>MUTYH</i> | c.734G>A               | p.Arg245His              |                   | Pathogenic                  |                                 |
| 12 | <i>BLM</i>   | c.1642C>T              | p.Gln548*                |                   | Pathogenic                  | Breast                          |
|    | <i>BRCA1</i> | c.3700_3704delGTAAA    | p.Val1234_Asn1235?fs     |                   | Pathogenic                  |                                 |

|    |                |                                  |                          |                             |                        |
|----|----------------|----------------------------------|--------------------------|-----------------------------|------------------------|
| 13 | <i>BRCA2</i>   | c.9154C>T                        | p.Arg3052Trp             | Pathogenic                  | Breast                 |
|    | <i>MUTYH</i>   | c.1187G>A                        | p.Gly396Asp              | Pathogenic                  |                        |
| 14 | <i>FAM175A</i> | c.1106dupG                       | p.Ser370Ilefs*2          | Pathogenic                  | Triple Negative Breast |
|    | <i>RAD50</i>   | c.3779_3791dupGTAAGTCCAGCT       | p.Leu1265*               | Pathogenic                  |                        |
| 15 | <i>BRCA1</i>   | c.5266dupC                       | p.Gln1756Profs*74        | Pathogenic                  | Not Available (NA)     |
|    | <i>RAD50</i>   | c.326_329delCAGA                 | p.Thr109Asnfs*20         | Pathogenic                  |                        |
| 16 | <i>NBN</i>     | c.657_661delACAAA                | p.Lys219Asnfs*16         | Pathogenic                  | Breast                 |
|    | <i>PMS2</i>    | c.1261C>T                        | p.Arg421*                | Pathogenic                  |                        |
| 17 | <i>BRCA1</i>   | c.843_846delCTCA                 | p.Ser282Tyrfs*15         | Pathogenic                  | Breast                 |
|    | <i>CHEK2</i>   | c.470T>C                         | p.Ile157Thr              | Pathogenic (low penetrance) |                        |
| 18 | <i>CHEK2</i>   | c.470T>C                         | p.Ile157Thr              | Pathogenic (low penetrance) | Breast                 |
|    | <i>CHEK2</i>   | c.499G>A                         | p.Gly167Arg              | Likely Pathogenic           |                        |
| 19 | <i>MUTYH</i>   | c.734G>A                         | p.Arg245His              | Pathogenic                  | Breast                 |
|    | <i>PALB2</i>   | c.2257C>T                        | p.Arg753*                | Pathogenic                  |                        |
| 20 | <i>MUTYH</i>   | c.536A>G                         | p.Tyr179Cys              | Pathogenic                  | Breast                 |
|    | <i>RAD51C</i>  | c.905-2A>G                       |                          | Pathogenic                  |                        |
| 21 | <i>BRCA1</i>   | c.5212G>A                        | p.Gly1738Arg             | Pathogenic                  | Breast                 |
|    | <i>BRIP1</i>   | c.2947delA                       | p.Ile983Leufs*2          | Likely Pathogenic           |                        |
| 22 | <i>MUTYH</i>   | c.1437_1439delGGA                | p.Glu479_Glu480delinsGlu | Pathogenic                  | CRC                    |
|    | <i>RET</i>     | c.2410G>A                        | p.Val804Met              | Pathogenic                  |                        |
| 23 | <i>BRCA2</i>   | c.9371A>T                        | p.Asn3124Ile             | Likely Pathogenic           | Breast                 |
|    | <i>CHEK2</i>   | c.902delT                        | p.Leu301Trpfs*3          | Pathogenic                  |                        |
| 24 | <i>APC</i>     | c.4391_4394delAGAG               | p.Glu1464Valfs*8         | Pathogenic                  | Polyps                 |
|    | <i>PALB2</i>   | c.3340C>T                        | p.Gln1114*               | Pathogenic                  |                        |
| 25 | <i>BRIP1</i>   | c.2575+1G>A                      |                          | Likely Pathogenic           | CRC                    |
|    | <i>MLH1</i>    | c.(453+1_454-1)_(545+1_546-1)del |                          | Pathogenic                  |                        |
